1 Spatial and temporal relationship between focal and rotational drivers and their  
2 relationship to structural remodeling in patients with persistent AF.

3  
4 Shohreh Honarbakhsh<sup>\*^</sup> MRCP PhD BSc, Caroline Roney PhD<sup>^</sup>, Amy Wharmby<sup>\*</sup>, Caterina  
5 Vidal Horrach<sup>^</sup>, Ross J. Hunter<sup>\*</sup> FESC PhD.

6  
7 <sup>\*</sup>The Barts Heart Centre, Barts Health NHS Trust, Electrophysiology department, London,  
8 United Kingdom

9 <sup>^</sup>Queen Mary University of London, London, United Kingdom

10 Short title: Relationship between focal and rotational drivers.

11 Word count: 4317

12 Disclosures: Dr Honarbakhsh is a British Heart Foundation Clinical Intermediate Fellow and  
13 receives a British Heart Foundation Fellowship Grant. Dr Honarbakhsh has received speaker's  
14 fees from Abbott. Professor Hunter has received research grants, educational grants, and  
15 speaker's fees from Biosense Webster, Medtronic and Abbott. Dr Honarbakhsh and Professor  
16 Hunter are shareholders in Rhythm AI Ltd. Dr Roney acknowledges a UKRI Future Leaders  
17 Fellowship (MR/W004720/1).

18  
19 Funding: British Heart Foundation Clinical Intermediate Fellowship FS/ICRF/22/26034

20  
21 Corresponding Author:

22 Dr Shohreh Honarbakhsh MRCP BSc PhD

23 Cardiology and Electrophysiology Consultant

24 Senior Clinical Lecturer at Queen Mary University of London

25 The Barts Heart Centre, Barts Health NHS trust

26 W. Smithfield

27 London

28 EC1A 7BE

29 Email: [shohreh.honarbaksh@nhs.net](mailto:shohreh.honarbaksh@nhs.net)

30 **ABSTRACT**

31 **Background-** Focal and rotational activations have been demonstrated in AF, but their  
32 relationship to each other and to structural remodeling remains unclear.

33  
34 **Methods-** Patients undergoing catheter ablation for persistent AF were included. All patients  
35 underwent pulmonary vein isolation. Unipolar signals were collected to identify focal and  
36 rotational drivers using a wavefront propagation algorithm. Aim was to assess the relationship of  
37 drivers to underlying low voltage zones (LVZs; <0.5mV) and to determine whether there was a  
38 temporal ( $\leq 500$ ms) and spatial ( $\leq 12$ mm) relationship between focal and rotational drivers.

39  
40 **Results-** In 40 patients, 86 drivers were identified (57, 66.3% focal and 29, 33.7% rotational).  
41 Rotational drivers showed co-localized to LVZs (21/29, 72.4%) whilst focal drivers did not  
42 (11/57 in LVZ, 19.3%;  $p < 0.001$ ). The proportion of the left atrium (LA) occupied by LVZs  
43 predicted rotational driver occurrence (AUC 0.96, 95%CI 0.90-1.00;  $p < 0.001$ ). In patients with a  
44 relatively healthy atrium, where the atrium was made up of  $\leq 15\%$  LVZs, only focal drivers were  
45 identified. Eighteen of the 21 (85.7%) rotational drivers located in LVZs also showed a temporal  
46 and spatial relationship to a focal driver. The presence of a LVZ within 12 mm of the focal driver  
47 was a strong predictor for whether a paired rotational driver would also occur in that vicinity.

48  
49 **Conclusions-** Rotational drivers are largely confined to areas of structural remodelling and have  
50 a clear spatial and temporal relationship with focal drivers suggesting they are dependent on  
51 them. These novel mechanistic observations outline a plausible model for patient specific  
52 mechanisms maintaining AF.

53  
54 **Keywords-** Atrial fibrillation, Localized drivers, Catheter ablation, Mapping.

55

56

## 57 INTRODUCTION

58 It has been proposed that localized drivers maintain atrial fibrillation (AF). Several definitions  
59 have been used for these localized drivers, but two potential forms of localized drivers have been  
60 identified to date, focal and rotational. Studies have suggested that focal drivers and rotational  
61 drivers are both important in maintaining AF (1). Although the sites of these drivers appear to be  
62 patient specific, it is not clear whether there is a direct relationship between the two driver types  
63 or how they interact with the underlying atrial substrate, and this remains a large gap in our  
64 understanding of AF.

65  
66 Drivers with rotational activity have a predilection for low voltage zones (LVZs) (1-4). It has  
67 long been proposed that functional reentry in the form of rotors may be responsible for this  
68 activity, and although rotors might gravitate towards areas of scarring, they may occur in healthy  
69 tissue (5,6). As functional reentry or anatomical reentry around a fixed obstacle such as scar are  
70 often initiated by premature electrical stimulation, it is possible that focal activity plays a role in  
71 initiating or maintaining these rotational drivers.

72  
73 We hypothesized that rotational drivers occur predominantly in areas of structural remodeling  
74 and are initiated and supported by nearby focal drivers. To investigate this, rotational and focal  
75 drivers were mapped in patients with persistent AF and we hypothesized that there would be a  
76 spatial and temporal relationship between rotational and focal drivers, whereby rotational drivers  
77 would occur immediately following focal drivers when there is structural remodeling nearby.

## 78 79 METHODS

80 Patients undergoing catheter ablation for persistent AF (<24 months and no previous AF  
81 ablation) were prospectively included. Exclusion criteria included age <18 years or reversible  
82 cause of AF. Patients provided informed consent for their study involvement which was  
83 approved by the UK National Research Ethics Service (22/PR/0961). The study was

84 prospectively registered on clinicaltrials.gov (NCT05633303). Procedures were performed under  
85 either conscious sedation or general anaesthetic as per the clinician and patient's preference. All  
86 procedures were performed on uninterrupted anticoagulation therapy with heparin administration  
87 during the procedure to maintain an activated clotting time (ACT) of >300 seconds.

88  
89 ***Electrophysiological mapping***

90 Ensite X (Abbott, Chicago, IL, USA) was used as the 3D mapping system. Left atrial (LA)  
91 anatomical maps were created using the HD-grid mapping catheter (Abbott, Chicago, IL, USA).  
92 All patients had a high-density omnipolar voltage (OV) map created using the HD-grid catheter.  
93 Points that were  $\geq 5$ mm from the geometry surface were filtered as not being in contact with the  
94 myocardium, and points acquired were respiratory gated to optimize the accuracy of anatomical  
95 localization. A minimum of 4000 bipolar voltage points were collected per patient with the aim  
96 of ensuring adequate atrial coverage. The interpolation threshold was set to 5mm for surface  
97 color projection and points were collected aiming for complete LA coverage (i.e., with no area  
98 >5mm from a data point). A decapolar catheter (Boston Scientific, MA, USA) was positioned in  
99 the coronary sinus (CS). The Tactiflex ablation catheter (Abbott, Chicago, IL, USA) was used  
100 for ablation.

101  
102 ***Ablation approach***

103 Following voltage map creation, all patients underwent pulmonary vein isolation (PVI) with  
104 bilateral wide area circumferential ablation using radiofrequency ablation. PVI was achieved  
105 with lesions placed 5-10 mm outside the veno-atrial junction aiming for isolation as ipsilateral  
106 PV pairs. The anterior border of the left PVs was ablated on the LA appendage ridge where  
107 possible, or on the appendage side of the ridge where this was unstable. Lesions were delivered  
108 on the venous side of the appendage ridge only where this was necessary to isolate PVs. No  
109 further ablation was performed beyond PVI unless the patient organized into an atrial

110 tachycardia (AT) or had previously documented AT in addition to AF. If the patients remained in  
111 AF, DC cardioversion (DCCV) was performed to achieve SR.

112

### 113 *Omnipolar voltage*

114 For OV assessment, signals were obtained from three non-colinear electrodes that make up a  
115 clique. These are used to calculate the BV in all directions over 360 degrees. The BV with the  
116 largest bipolar peak-to-peak voltage is then used to compute a local virtual bipolar signal that  
117 represents the OV. Following this, all peak-to-peak voltage points identified within a 1mm sphere  
118 were identified. The voltage point with the highest OT certainty (numeric value ranging from 0-1  
119 indicating how certain the calculated activation direction is) and largest voltage amplitude is then  
120 used for the final OV.

121

122 OV was used overcome the underestimation of voltage in AF due to impact of wavefront  
123 directionality and fractionation (7,8).

124

### 125 *Unipolar recordings*

126 Following PVI, all patients had 30-seconds unipolar recordings collected using the HD-grid  
127 catheter. Unipolar recordings were collected by referencing to Wilson Central Terminal (WCT).  
128 A minimum of 30, 30-seconds unipolar recordings were collected to ensure adequate LA  
129 coverage. Unipolar recordings were overlapped to allow effective wavefront tracking. With each  
130 unipolar recording xyz coordinates were obtained for the electrode location to allow pairing of  
131 the electrodes to their neighboring electrodes and allow electrode position on the geometry to be  
132 determined.

133

134 The study aim was to assess the relationship between focal and rotational drivers in the LA and  
135 their relationship to structural LA remodeling. The RA was not analyzed.

136

### 137 *Offline analysis*

138 *i) Identification of focal drivers and rotational drivers*

139 A wavefront tracking algorithm developed and executed in Matlab (Mathworks, MA, USA) was  
140 used offline to identify focal and rotational drivers. Unipolar electrograms, electrode xyz  
141 coordinates and geometry data were utilized. Firstly, ventricular far field signals were filtered.  
142 Atrial signals were then annotated. Filtering of far field ventricular and atrial signals were  
143 evaluated manually to ensure accurate exclusion of far field signals and atrial signal annotation.  
144 Inaccurate atrial annotations due to noise or fractionated signals were excluded from the  
145 analysis.

146  
147 Electrodes were then paired to their neighboring electrodes through comparing geodesic distance  
148 between electrodes. The atrial activations were then compared amongst these electrodes to track  
149 the wavefront propagation. Firstly, stable wavefront propagation was identified. A stable  
150 wavefront propagation was defined as one that demonstrated consecutive repetition  $\geq 2$  cycles  
151 with  $> 2$  repetitions over the 30-second recording. Combining multiple overlapping unipolar  
152 recordings allowed a prediction of the wavefront propagation over a segment to be determined.  
153 The stable wavefront propagations were then evaluated to identify a focal and rotational driver.  
154 For a focal driver to be identified the wavefront tracking algorithm needed to **i)** demonstrate a  
155 radial spread of wavefront i.e., wavefront spread from the electrode to neighboring electrodes at  
156  $\geq 120$  degrees **ii)** the electrode demonstrating earlier atrial signal compared to neighboring  
157 electrodes demonstrating a QS morphology on the unipolar recordings. To identify a rotational  
158 driver **i)** a series of electrograms in consecutive electrodes needed to occupy more than 50% of  
159 the local cycle length **ii)** with less than 20mm between the starting and ending point of the  
160 activation. Two or more such activations occurring where at least 80% of the electrodes followed  
161 the same propagation pattern were defined as rotational activation (9). The methodology used is  
162 summarized in Figure 1.

163

164 *ii) Anatomical distribution of drivers*

165 The distribution of the drivers on a per anatomical segments were evaluated. A six-segment  
166 model was used sub-dividing the LA into lateral, septum, anterior, posterior, inferior and roof.

167

168 *iii) Driver relationship with underlying omnipolar voltage*

169 The OV maps were re-created in Matlab and the driver sites were superimposed on the OV maps  
170 for analysis of the spatial relationship between LVZs and the different driver types. The  
171 underlying OV was determined at the driver sites and was defined as either non-LVZs (nLVZs;  
172  $\geq 0.5$  mV) or LVZs ( $< 0.5$  mV) (10). The voltage point was then projected onto a replica of the  
173 anatomy created in EnsiteX and each point was ascribed a surface area with a 5mm radius.  
174 Points with a voltage of  $< 0.5$  mV were colored red whilst green was indicative of a voltage of  
175  $\geq 0.5$  mV. The driver was deemed to occur in a LVZ if  $> 30\%$  of the OV points within the surface  
176 area covered with a 6mm radius were  $< 0.5$  mV.

177

178 Since rotational drivers may occupy a wider area than focal drivers, the relationship between  
179 rotational drivers and underlying structural remodeling was also determined through **i)**  
180 calculating the surface area covered by the rotational driver and then **ii)** determining the  
181 proportion of LVZs within this surface area. The surface area covered by the rotational driver  
182 was determined through tracing the inner border of the rotational activity. Within this designated  
183 area, all bipolar voltage points were identified and the proportion of these that were  $< 0.5$  mV  
184 was determined. The rotational driver was deemed to occur in a LVZ if  $> 30\%$  of the bipolar  
185 voltage points within the surface area were  $< 0.5$  mV.

186

187 *iv) Spatial relationship between focal and rotational drivers*

188 Drivers were superimposed on the offline OV maps. For focal drivers the xyz coordinates of the  
189 leading electrode with a QS morphology was used to display the position on the OV maps. For  
190 rotational drivers the center of the traced rotational driver was used to display the position on the



191 OV maps. Focal and rotational drivers were said to have a spatial relationship and were termed  
192 paired if they occurred within a 12mm geodesic distance of one another measured center to  
193 center. A geodesic distance of 12mm was used by considering the electrode distance between the  
194 center of a HD grid catheter to the center of another HD-grid catheter which measures between  
195 6-12 mm. The maximum measurement was utilized. The underlying voltage at these sites was  
196 determined.

197

198 *v) Temporal relationship between focal and rotational drivers*

199 The temporal relationship between focal and rotational drivers was assessed by reviewing  
200 wavefront tracking algorithms and their corresponding electrograms. Focal and rotational drivers  
201 were defined as paired drivers if they occurred within 500ms of each other.

202

203 *vi) Driver characteristics*

204 For each driver the temporal stability and recurrence rate was determined using the wavefront  
205 propagation algorithm. Temporal stability was defined as the mean number of consecutive  
206 repetitions identified during each occurrence of a driver. The number of times a driver was  
207 identified and met the study definition of driver during a 30-second recording was defined as the  
208 recurrence rate (2,11).

209

210 *Statistical analyses*

211 Statistical analyses were performed using SPSS (IBM SPSS Statistics, Version 25 IBM Corp,  
212 NY, USA). Continuous variables are displayed as mean  $\pm$  standard deviation (SD) or median  
213 (range). Categorical variables are presented as numbers and percentages. The Student T-test or  
214 Mann-Whitney U test was used for comparison of continuous variables. Spearman rank  
215 correlation coefficient was determined to assess the relationship between AF duration and  
216 proportion of LVZs. Binary logistic regression was used to identify predictors of rotational  
217 drivers. Area under the curve (AUC) was calculated to determine if the proportion of LVZs

218 could predict the driver type identified during mapping. P-value of  $<0.05$  was deemed  
219 significant.

220

## 221 **RESULTS**

222 The study included 40 patients with a mean age of  $60.5\pm 11.9$  years and predominantly male  
223 ( $n=30$ , 75.0%). The mean AF duration was  $17.1\pm 6.7$  months. Out of these patients, 14 (35.0%)  
224 had an AF duration  $\leq 12$  months and 26 (65.0%) had an AF duration  $>12$  months. Baseline  
225 characteristics are demonstrated in Table 1. All patients were in AF at the start of their  
226 procedure. No complications were encountered. Post PVI all patients remained in AF and  
227 underwent DCCV to SR. No further ablation beyond PVI was performed.

228

### 229 *Identification of localized drivers*

230 In the 40 patients, 105 drivers were identified using the novel wavefront propagation maps  
231 ( $2.6\pm 0.9$  per patient). All patients had drivers identified. Out of the 105 localized drivers  
232 identified, 57 (66.3%) were focal in nature and 48 (45.7%) were rotational drivers.

233

### 234 *Characteristics of drivers*

235 During a 30-second recording, drivers demonstrated a mean temporal stability of  $3.6\pm 0.8$   
236 consecutive repetitions. Focal drivers showed greater temporal stability than rotational drivers  
237 did ( $4.2\pm 0.5$  vs.  $2.9\pm 0.8$ ;  $p<0.001$ ). During a 30-second recording, the drivers showed on average  
238 a recurrence rate of  $8.7\pm 3.2$  times. Focal drivers demonstrated a higher recurrence rate than  
239 rotational drivers ( $12.1\pm 3.1$  vs.  $7.1\pm 4.6$ ;  $p<0.001$ ).

240

241 A majority of the drivers identified were mapped to the anterior wall ( $n=29$ ; 27.6%), roof ( $n=23$ ,  
242 21.9), posterior wall ( $n=16$ ; 15.2%), lateral wall ( $n=14$ , 13.3%), septum ( $n=12$ , 11.4%) and  
243 inferior wall ( $n=11$ , 10.5%). The anatomical distribution was consistent between both focal and  
244 rotational drivers (Figure 2A-B).

245

246 *Underlying bipolar voltage zone at driver sites.*

247 OV maps in AF were available in all 40 patients. The average number of voltage points per  
248 patient were  $77219.6 \pm 51075.7$  points. The proportion of LA surface area consisting of LVZs in  
249 those with an AF duration of <12 months was  $16.4 \pm 4.5\%$  whilst in those with an AF duration of  
250 >12 months it was  $30.1 \pm 7.8\%$ ;  $p < 0.001$ . There was a strong positive correlation between AF  
251 duration and proportion of LVZs ( $r_s = 0.93$ ;  $p < 0.001$ ).

252

253 *i) Focal drivers*

254 In total, 37 patients (92.5%) had focal drivers identified ( $1.5 \pm 0.7$  per patient). Out of the 57 focal  
255 drivers identified a majority were mapped to nLVZs ( $n=46$ , 80.7%). There was also no  
256 difference in temporal stability ( $4.1 \pm 0.5$  vs.  $3.9 \pm 0.7$ ;  $p=0.78$ ) or recurrence rate ( $4.7 \pm 1.9$  vs.  
257  $4.9 \pm 1.6$ ;  $p=0.65$ ) of focal drivers mapped to LVZs vs. those mapped to nLVZs. Proportion of  
258 nLVZs was a significant predictor of identifying focal drivers (Odds ratio 1.15, 95%CI 1.04-  
259 1.26;  $p=0.005$ ). The proportion of the LA occupied by nLVZs showed an AUC of 0.78 (95%CI  
260 0.64-0.93;  $p=0.003$ ) in predicting the presence of focal drivers with an optimal cutoff of 74.5%  
261 (Sensitivity 81.3% and Specificity 72.0%). In patients with a relatively healthy atrium, where the  
262 atrium was made up of  $\leq 15\%$  LVZs, only focal drivers were identified.

263

264 *ii) Rotational drivers*

265 In total, 30 patients (75.0%) had rotational drivers identified ( $1.6 \pm 0.3$  per patient). Out of the 48  
266 rotational drivers, 35 (72.9%) were mapped to LVZs ( $0.31 \pm 1.2$ mV). Whilst rotational drivers  
267 showed a predilection to LVZs, focal drivers did not ( $p < 0.001$ ). Proportion of LVZs was a  
268 significant predictor of identifying rotational drivers (Odds ratio 1.78, 95%CI 1.09-2.91;  
269  $p=0.02$ ). The proportion of the LA occupied by LVZs showed an AUC of 0.96 (95%CI 0.90-  
270 1.00;  $p < 0.001$ ) in predicting the presence of rotational driver with an optimal cutoff of 19.5%  
271 (Sensitivity 92.9% and Specificity 76.9%).

272  
273 Rotational drivers mapped to LVZs demonstrated greater temporal stability ( $3.3\pm 0.8$  vs.  $2.6\pm 0.5$ ,  
274  $p=0.002$ ) and recurrence rate ( $3.9\pm 1.8$  vs.  $2.7\pm 2.0$ ;  $p=0.002$ ) compared to rotational drivers  
275 mapped to nLVZs.

276  
277 ***Relationship between focal and rotational drivers.***

278 Focal and rotational drivers occurring in close proximity to each other ( $\leq 12$ mm) was seen for 32  
279 pairs i.e., 64 out of the 105 (61.0%) drivers identified. Thirty-two out of 35 (91.4%) rotational  
280 drivers were mapped in close proximity to a focal driver whilst 32 out of the 57 (56.1%) focal  
281 drivers were mapped to an area in close proximity to a rotational driver ( $p<0.001$ ) (Figure 3A-D  
282 and Figure 4A-B).

283  
284 Beyond demonstrating a spatial relationship, focal and rotational drivers that occurred in close  
285 proximity to each other also demonstrated a temporal relationship. Out of the 32 pairs, 29 focal  
286 drivers occurred within 500ms before the occurrence of the rotational driver (90.6%) with the  
287 focal drivers occurring on average  $389\pm 65$ ms before the rotational driver measured from the  
288 onset of the focal driver. The rotational driver occurred on average following  $2.5\pm 0.7$  cycles of  
289 the focal driver.

290  
291 ***Relationship between LVZs and the pairing of focal and rotational drivers***

292 All the 32 paired focal drivers were mapped to a nLVZ whilst all of the 32 paired rotational  
293 drivers were mapped to a LVZ  $<12$  mm away (Figure 5A-D). When considering all 57 focal  
294 drivers, the presence of a LVZ within 12 mm was a strong predictor for whether a paired  
295 rotational driver would also occur in that vicinity with a sensitivity of 100% (95%CI 81.5-  
296 100.0%) and specificity of 71.8% (95%CI 55.1-85.0%). The PPV and NPV was 62.1%, 95%CI  
297 50.0-73.0% and 100% respectively.

298

299 Of the 48 rotational drivers, 35 (72.9%) were mapped to LVZ, and 32 of these (91.4%) were  
300 mapped to a close proximity to a focal driver. Rotational drivers were therefore more likely to be  
301 paired to a focal driver if the rotational driver was mapped to a site of LVZ (0/8, 0% nLVZ  
302 versus 32/35, 91.4% LVZ;  $p < 0.001$ ). Of the 8 rotational drivers mapped to nLVZ, none of which  
303 met our definition for pairing with focal drivers, the median geodesic distance to a focal driver  
304 was  $33.2 \pm 9.2$ mm.

305

## 306 **DISCUSSION**

### 307 *Main study findings*

308 In this study, we have effectively mapped focal and rotational drivers in persistent AF that were  
309 spatially stable but with temporal periodicity. We also observed for the first time that although  
310 focal drivers often occur in isolation, rotational drivers have a strong spatial and temporal  
311 association with focal drivers, occurring mostly in close proximity to focal drivers and during or  
312 shortly after a burst of focal activations. Whilst focal drivers were shown to co-localize to  
313 nLVZs, rotational drivers co-localized to LVZs. Rotational drivers not paired to focal activations  
314 and occurring in nLVZs recurred less often (lower recurrence rate) and completed for fewer  
315 cycles at each occurrence (lower temporal stability). It has been shown drivers with a higher  
316 temporal stability and recurrence rate are more likely to result in AF termination (2,11) this  
317 potentially suggests that these are less mechanistic importance.

318

### 319 *Relationship between drivers and structural remodeling*

320 In this study, we have shown that increasing AF duration is associated with a greater proportion  
321 of LVZs. This is consistent with the findings of other studies which have shown that AF duration  
322 correlates to the level of atrial structural remodeling (12,13). This study has shown that focal  
323 drivers in contrast to rotational drivers are more likely in those with less structural remodeling,  
324 and that rotational drivers may only occur in those with significant structural remodeling.

325 Rotational drivers have in this study and previous studies shown to have a predilection to LVZs  
326 (1-4). A majority of rotational drivers in this study were mapped to LVZs. Rotational drivers  
327 mapped to LVZs demonstrated greater temporal stability and higher recurrence rate than  
328 rotational drivers mapped to nLVZs. This may suggest that rotational drivers mapped to LVZs  
329 play a greater mechanistic role in maintaining AF than those mapped to nLVZ.

330  
331 It is unclear why this should be. One explanation might be that rotational drivers in nLVZ are  
332 functional and may represent true rotors, whereas those in LVZ are associated with structural  
333 remodeling and an anatomically defined circuit. These may therefore represent separate  
334 phenomena, and it appears that the latter is either more important or possibly is more easily  
335 eliminated with ablation.

336  
337 In this study, a majority of drivers identified were focal in nature. Our previous work has shown  
338 that rotational drivers were more prevalent in persistent AF (1,2). The shorter AF duration in this  
339 study cohort in patients with healthy atria could account for the discrepancy seen. This again  
340 supports the hypothesis that rotational drivers are predominantly limited to areas of structural  
341 remodelling.

#### 342 343 ***Relationship between focal and rotational drivers***

344 This is the first study to report a relationship between focal and rotational drivers in AF which is  
345 arguably an important evolution in our understanding of AF. Although focal drivers often  
346 occurred in isolation, rotational drivers were mostly found in close proximity to focal drivers and  
347 mostly occurred during or shortly after the focal activations. In fact, the presence of a LVZ near  
348 a focal driver was a strong predictor of whether it would be paired to a rotational driver.

349  
350 The mechanisms underlying what is described as rotational drivers remain unclear. Rotational  
351 drivers mapped to nLVZs are not paired to focal drivers, are less temporally stable and recur

352 less. This may suggest they are more likely to be sustained by functional re-entry and may be  
353 less mechanistically important. However, the observation that rotational drivers mapped to LVZs  
354 mostly occur in close proximity to focal drivers arguably suggests anatomical re-entry, whereby  
355 the focal driver triggers re-entry. The temporal relationship, with the focal driver preceding the  
356 rotational driver in a majority of cases also supports this conclusion.

357

### 358 *Implications for ablation strategy*

359 Others have used a voltage-guided substrate modification technique which adapts the AF  
360 ablation strategy to the underlying bipolar voltage map (14-17). In these studies, patients with  
361 LVZs will undergo further ablation to homogenize scar in addition to PVI whilst those with  
362 healthy atria have no further ablation beyond PVI. Utilizing this approach may eliminate many  
363 of the rotational drivers which depend on structural remodeling. However, it may not be  
364 sensitive or specific for driver sites and may create further scar and predispose to ATs. It may be  
365 possible to refine this approach by targeting LVZ associated with rapid activity in AF (16),  
366 although there are conflicting data regarding the usefulness of electrogram characteristics or CL  
367 as a surrogate marker for sites driving AF (1,5,6). Another possibility might be to examine  
368 conduction velocity dynamic in LVZs in SR to determine whether they are likely to support  
369 rotational activity in AF (3).

370

371 A major limitation to a strategy targeting LVZs is that it will not address the focal drivers  
372 observed in this study. Focal activations may represent different phenomena such as micro-  
373 reentry or intramural re-entry, or perhaps given the lack of association with LVZs they may  
374 represent sites automaticity and co-locate to sites of ganglionated plexi innervation. Regardless  
375 of the underlying mechanism, focal drivers may be legitimate ablation targets in AF. It is  
376 therefore likely that a strategy targeting either focal or rotational drivers alone (either directly or  
377 through surrogates) will miss mechanistically important targets.

378  
379 A better understanding of the mechanisms of localized drivers will ensure the ablation strategy is  
380 adapted to the stage of AF. In patients with healthy atria, focal drivers were predominantly  
381 identified and therefore in this context an ablation strategy prioritising focal drivers would seem  
382 ideal. However, in scarred atria rotational drivers were identified thereby suggesting that  
383 rotational drivers should be targeted in addition to focal drivers. Further to this, the higher  
384 temporal stability and recurrence rate of rotational drivers paired to focal drivers potentially  
385 indicated they are mechanistically more important in AF and should be prioritised with ablation  
386 in a hierarchal approach.

387  
388 These patient specific mechanisms may explain difficulty treating AF with current standardised  
389 approaches. Further randomized controlled trials are needed to evaluate driver-guided ablation in  
390 different clinical protocols.

391  
392 *Limitations*

393 The focus of this study was to evaluate the relationship between focal and rotational drivers to  
394 underlying scar and to each other. In this study, the drivers were not ablated and therefore their  
395 mechanistic importance in AF with regards to electrophysiological endpoints has not been  
396 established. However, we have previously shown that a majority of drivers identified using this  
397 definition for a focal and rotational driver result in an electrophysiological response on ablation  
398 and thereby indicating an important mechanistic role in AF (2,11,18).

399  
400 **CONCLUSIONS**

401 These data demonstrate that intermittent localized focal and rotational drivers occur in patients  
402 with persistent AF post-PVI. Although focal drivers seem unaffected by the presence or absence  
403 of structural remodeling, rotational drivers were largely dependent on the underlying substrate.  
404 Rotational drivers are often paired to focal drivers and occur when focal drivers are in close



405 proximity to LVZs. The higher temporal stability and recurrence rate of rotational drivers  
406 mapped to LVZs and, when paired with a focal driver compared to rotational drivers that are not  
407 is suggestive that these are mechanistically more important in AF and should be targeted as a  
408 priority allowing a hierarchical approach to driver ablation. The relationship between rotational  
409 and focal drivers also emphasises the importance to target both during localized driver ablation  
410 of AF. These novel mechanistic observations require further scrutiny using different mapping  
411 and imaging modalities but outline a plausible model for patient specific mechanisms  
412 maintaining AF.

413

## 414 REFERENCES

- 415 1. Honarbakhsh S, Schilling RJ, Providencia R et al. Characterization of drivers maintaining  
416 atrial fibrillation: Correlation with markers of rapidity and organization on spectral analysis.  
417 Heart rhythm 2018.
- 418 2. Honarbakhsh S, Schilling RJ, Dhillon G et al. A Novel Mapping System for Panoramic  
419 Mapping of the Left Atrium: Application to Detect and Characterize Localized Sources  
420 Maintaining Atrial Fibrillation. JACC Clin Electrophysiol 2018;4:124-134.
- 421 3. Honarbakhsh S, Schilling RJ, Orini M et al. Structural remodeling and conduction velocity  
422 dynamics in the human left atrium: Relationship with reentrant mechanisms sustaining atrial  
423 fibrillation. Heart rhythm 2018.
- 424 4. Haissaguerre M, Shah AJ, Cochet H et al. Intermittent drivers anchoring to structural  
425 heterogeneities as a major pathophysiological mechanism of human persistent atrial  
426 fibrillation. J Physiol 2016;594:2387-98.
- 427 5. Skanes AC, Mandapati R, Berenfeld O, Davidenko JM, Jalife J. Spatiotemporal periodicity  
428 during atrial fibrillation in the isolated sheep heart. Circulation 1998;98:1236-48.
- 429 6. Mandapati R, Skanes A, Chen J, Berenfeld O, Jalife J. Stable microreentrant sources as a  
430 mechanism of atrial fibrillation in the isolated sheep heart. Circulation 2000;101:194-9.
- 431 7. Haldar SK, Magtibay K, Porta-Sanchez A et al. Resolving Bipolar Electrogram Voltages  
432 During Atrial Fibrillation Using Omnipolar Mapping. Circ Arrhythm Electrophysiol  
433 2017;10.
- 434 8. Butcher C, Roney C, Wharmby A et al. In Atrial Fibrillation, Omnipolar Voltage Maps  
435 More Accurately Delineate Scar Than Bipolar Voltage Maps. JACC Clin Electrophysiol  
436 2023.

- 437 9. Verma A, Sarkozy A, Skanes A et al. Characterization and significance of localized sources  
438 identified by a novel automated algorithm during mapping of human persistent atrial  
439 fibrillation. *Journal of cardiovascular electrophysiology* 2018;29:1480-1488.
- 440 10. Sanders P, Morton JB, Davidson NC et al. Electrical remodeling of the atria in congestive  
441 heart failure: electrophysiological and electroanatomic mapping in humans. *Circulation*  
442 2003;108:1461-8.
- 443 11. Honarbakhsh S, Schilling RJ, Providencia R et al. Characterization of drivers maintaining  
444 atrial fibrillation: Correlation with markers of rapidity and organization on spectral analysis.  
445 *Heart Rhythm* 2018;15:1296-1303.
- 446 12. Lin Y, Yang B, Garcia FC et al. Comparison of left atrial electrophysiologic abnormalities  
447 during sinus rhythm in patients with different type of atrial fibrillation. *J Interv Card*  
448 *Electrophysiol* 2014;39:57-67.
- 449 13. Teh AW, Kistler PM, Lee G et al. Electroanatomic remodeling of the left atrium in  
450 paroxysmal and persistent atrial fibrillation patients without structural heart disease. *J*  
451 *Cardiovasc Electrophysiol* 2012;23:232-8.
- 452 14. Yang G, Yang B, Wei Y et al. Catheter Ablation of Nonparoxysmal Atrial Fibrillation Using  
453 Electrophysiologically Guided Substrate Modification During Sinus Rhythm After  
454 Pulmonary Vein Isolation. *Circulation Arrhythmia and electrophysiology* 2016;9:e003382.
- 455 15. Yagishita A, Gimbel JR, S DEO et al. Long-Term Outcome of Left Atrial Voltage-Guided  
456 Substrate Ablation During Atrial Fibrillation: A Novel Adjunctive Ablation Strategy. *J*  
457 *Cardiovasc Electrophysiol* 2017;28:147-155.
- 458 16. Jadidi AS, Lehrmann H, Keyl C et al. Ablation of Persistent Atrial Fibrillation Targeting  
459 Low-Voltage Areas With Selective Activation Characteristics. *Circulation Arrhythmia and*  
460 *electrophysiology* 2016;9.

- 461 17. Huo Y, Gaspar T, Schönbauer R et al. Low-Voltage Myocardium-Guided Ablation Trial of  
462 Persistent Atrial Fibrillation. NEJM Evidence 2022;1:EVIDoa2200141.
- 463 18. Honarbakhsh S, Schilling RJ, Providencia R et al. Automated detection of repetitive focal  
464 activations in persistent atrial fibrillation: Validation of a novel detection algorithm and  
465 application through panoramic and sequential mapping. J Cardiovasc Electrophysiol  
466 2019;30:58-66.
- 467

468 **Table 1- Baseline characteristics.**

469

| <b>Baseline characteristics</b>                     | <b>Cohort n=40</b> |
|-----------------------------------------------------|--------------------|
| Age yrs. mean $\pm$ SD                              | 60.5 $\pm$ 11.9    |
| Male n (%)                                          | 30 (75.0)          |
| Diabetes mellitus n (%)                             | 4 (10.0)           |
| Hypertension n (%)                                  | 16 (40.0)          |
| TIA/CVA* n (%)                                      | 4 (10.0)           |
| Ischemic heart disease n (%)                        | 8 (20.0)           |
| Cardiac surgery n (%)                               | 1 (1.0)            |
| Cardiomyopathy n (%)                                | 16 (40.0)          |
| OSA n (%)                                           | 6 (15.0)           |
| Body mass index $<35\text{kg/m}^2$ n (%)            | 29 (72.5)          |
| Left ventricular EF <sup>T</sup> $\geq 55\%$ n (%)  | 19 (47.5)          |
| LA size mm' mean $\pm$ SD                           | 44.6 $\pm$ 6.0     |
| AF duration months $\pm$ SD                         | 17.3 $\pm$ 6.7     |
| Current antiarrhythmic or rate-controlling strategy |                    |
| Beta-blockers including Sotalol n (%)               | 33 (82.5)          |
| Amiodarone n (%)                                    | 13 (32.5)          |
| Flecainide n (%)                                    | 4 (10.0)           |
| Calcium channel blocker n (%)                       | 2 (5.0)            |
| Digoxin n (%)                                       | 6 (15.0)           |
| Current anticoagulation strategy                    |                    |
| Warfarin n (%)                                      | 0 (0)              |
| Direct oral anticoagulants                          | 100 (100.0)        |
| Apixaban n (%)                                      | 19 (47.5)          |
| Edoxaban n (%)                                      | 10 (25.0)          |
| Rivaroxaban n (%)                                   | 11 (27.5)          |

\*TIA/CVA- Transient ischemic attack/Cerebrovascular attack

<sup>T</sup>EF- Ejection fraction

470 **Table 2-** *Demonstrates the characteristics of focal and rotational drivers identified.*  
471

|                                 | <b>Focal driver</b> | <b>Rotational driver</b> |
|---------------------------------|---------------------|--------------------------|
| Driver type n %                 | 57                  | 48                       |
| LVZs* n %                       | 11 (19.3)           | 13 (27.1)                |
| nLVZs <sup>T</sup> n %          | 46 (80.7)           | 35 (72.9)                |
| Temporal stability mean ± SD    | 4.0±0.6             | 3.0±0.6                  |
| Recurrence rate mean ± SD       | 4.8±1.7             | 3.3±1.9                  |
| Paired with another driver type | 32 (69.6)           | 32 (91.4)                |

\*LVZs- Low voltage zones

<sup>T</sup>nLVZs- Non low voltage zones

## 472 **FIGURE LEGEND**

473 **Figure 1-** The flow diagram demonstrates the study methodology used.

474

475 **Figure 2A-B-** Demonstrates the anatomical distribution of **A-** Focal drivers (f) **B-** Rotational  
476 drivers (r) on a 6-segment model (anterior, roof, septum, lateral, posterior, and inferior wall).

477

478 **Figure 3A-C-** Demonstrates **A-** A replica geometry and OV map created in EnsiteX in a  
479 posterior-anterior view (green highlights nLVZ ( $\geq 0.5\text{mV}$ ) and red highlights LVZs ( $< 0.5\text{mV}$ )).

480 A focal driver was mapped to a nLVZ (yellow circle), and a rotational driver was mapped in

481 close proximity to a LVZ (blue circle). **B-** Wavefront propagation map in a posterior-anterior

482 view created using the unipolar recordings. The top black circle highlights the wavefront

483 propagation of the focal driver, and the lower black circle highlights the wavefront propagation

484 of the rotational driver. **C-** Demonstrates the electrograms obtained at the focal driver site. This

485 demonstrates a QS morphology at the leading electrode (\*) with radial spread in activation to

486 neighboring electrodes. **D-** Demonstrates the electrograms obtained at the rotational driver site.

487 This demonstrates the spread of activation across consecutive electrodes occupying more than

488 50% of the local cycle length with more than 2 such activations.

489

490 **Figure 4A-B-** Demonstrates pie charts that summarize the distribution of **Ai-** Rotational drivers

491 in accordance with those mapped to LVZ (light blue) and nLVZs (dark blue) and **Aii-** The

492 proportion of the rotational drivers that occurred in close proximity to focal drivers (light orange)

493 and the proportion that did not (dark orange). All rotational drivers that occurred in close

494 proximity to focal drivers were mapped to LVZs. **Bi-** Focal drivers in accordance with those

495 mapped to LVZ (light blue) and nLVZs (dark blue) and **Bii-** The proportion of the focal drivers

496 that occurred in close proximity to rotational drivers (light orange) and the proportion that did

497 not (dark orange). All focal drivers that occurred in close proximity to rotational drivers were

498 mapped to nLVZs.

499

500 **Figure 5A-D-** Demonstrates rotational (blue circle) and focal (yellow circle) drivers  
501 superimposed on a replica LA geometry and OV map created in EnsiteX. The rotational and  
502 focal drivers occur in close vicinity to each other whereby the rotational driver is mapped to a  
503 LVZ and the focal driver to the border of the site of scar in a nLVZ. Focal and rotational driver  
504 mapped to the **A)** roof on a LA map in a roof view, **B)** posterior wall on a LA map in a posterior-  
505 anterior view and **C)** anterior wall on a LA map in anterior-posterior view **D)** posterior wall on a  
506 LA map in a tilted posterior-anterior view.



Drivers identified using  
wavefront tracking algorithm

1. **Stable wavefront propagation-** Consecutive repetition  $\geq 2$  cycles with  $>2$  repetitions over the 30-second recording.
2. **Focal driver-** *i)* Radial spread of wavefront at  $\geq 120$  degrees *ii)* QS morphology on the earliest signal.
3. **Rotational driver-** *i)* A series of electrograms in consecutive electrodes that occupied more than 50% of the local CL *ii)* with  $< 20$ mm between the starting and ending point of the activation. *iii)*  $\geq 2$  activations occurring where at least 80% of the electrodes follow the same propagation pattern.

Spatial & temporal relationship  
between drivers and underlying voltage

Spatial relationship between drivers  
and underlying voltage

Drivers were superimposed on the offline OV maps:

*i) Spatial relationship-* focal and rotational drivers that occurring in close vicinity to each other ( $\leq 12$ mm apart).

*ii) Temporal relationship-* focal and rotational drivers were defined as paired drivers if they occurred within 500ms of each other.

- OV maps recreated in Matlab.
- Drivers superimposed on OV maps.
- Driver was deemed to occur in a LVZ if  $>30\%$  of the OV points within the surface area covered with a 6mm radius were  $< 0.5$ mV.

**A**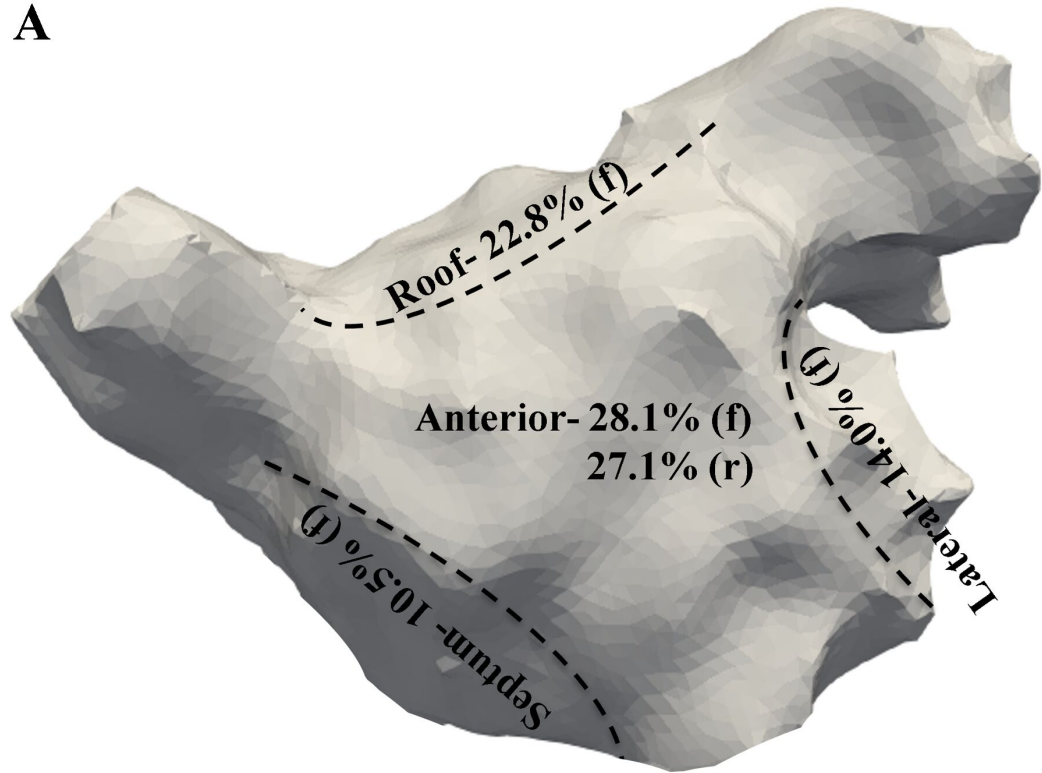**B**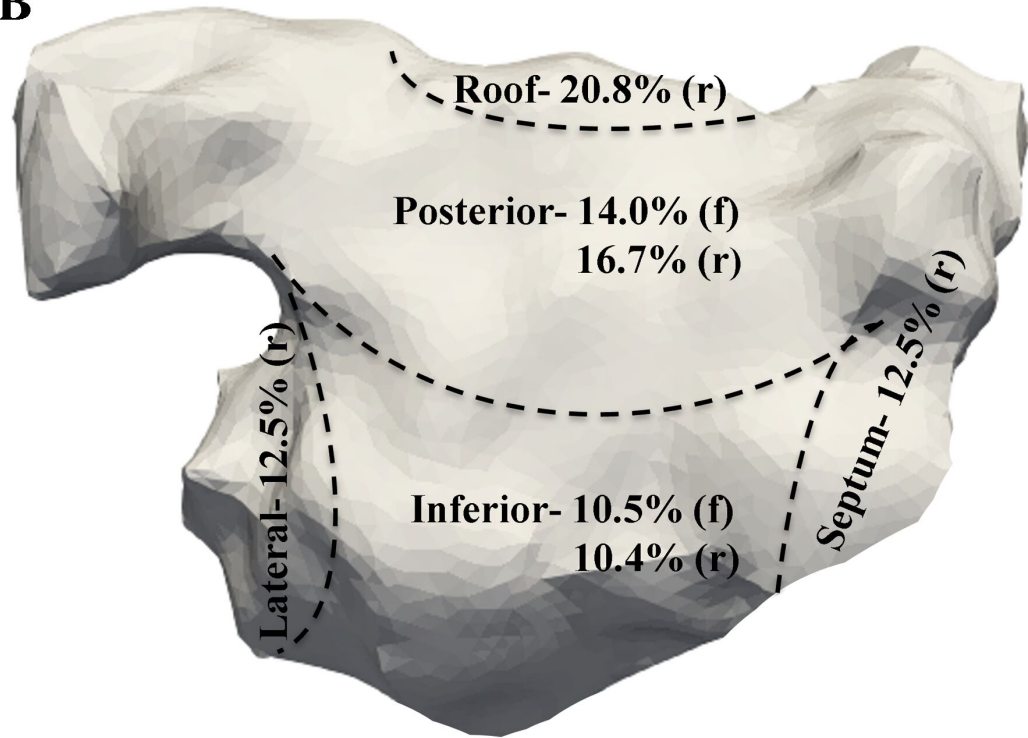

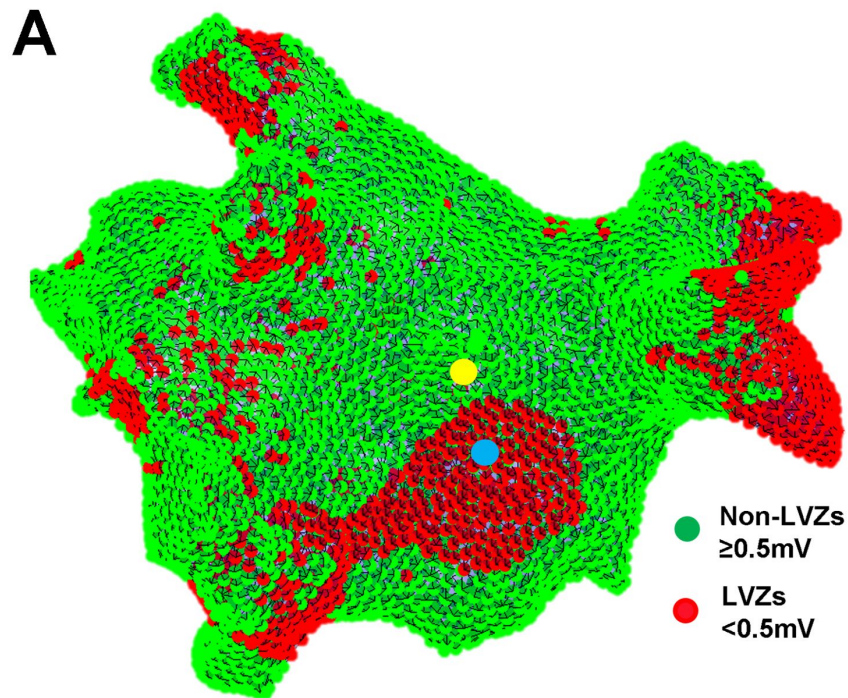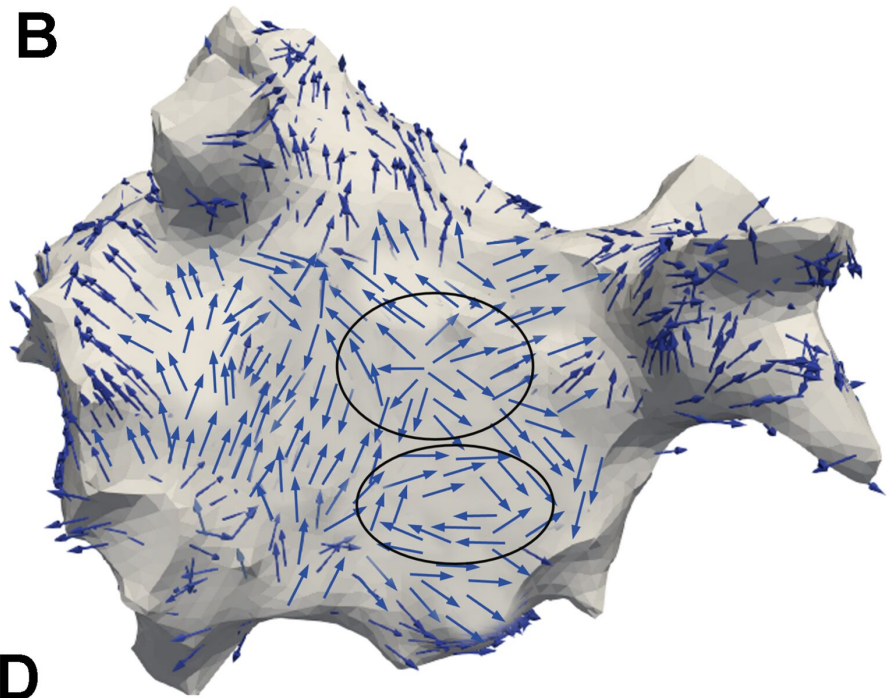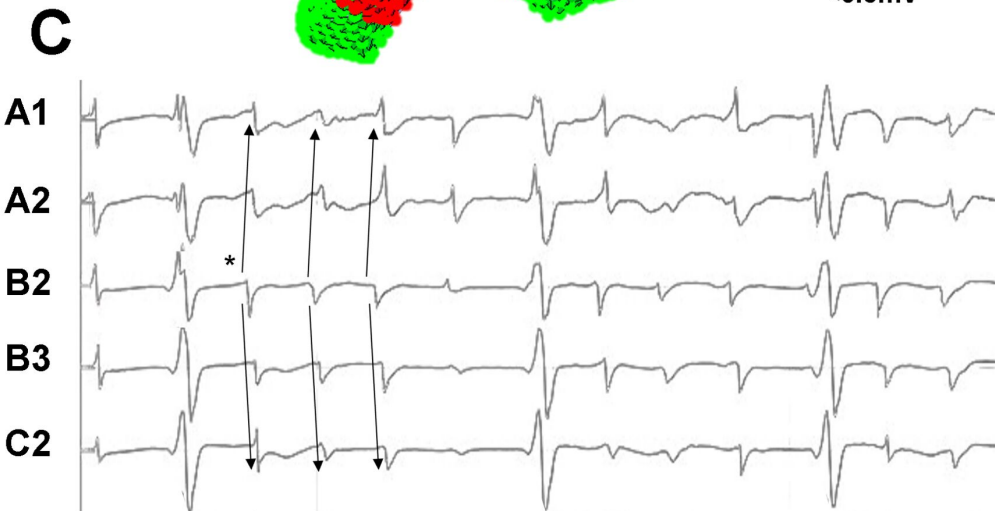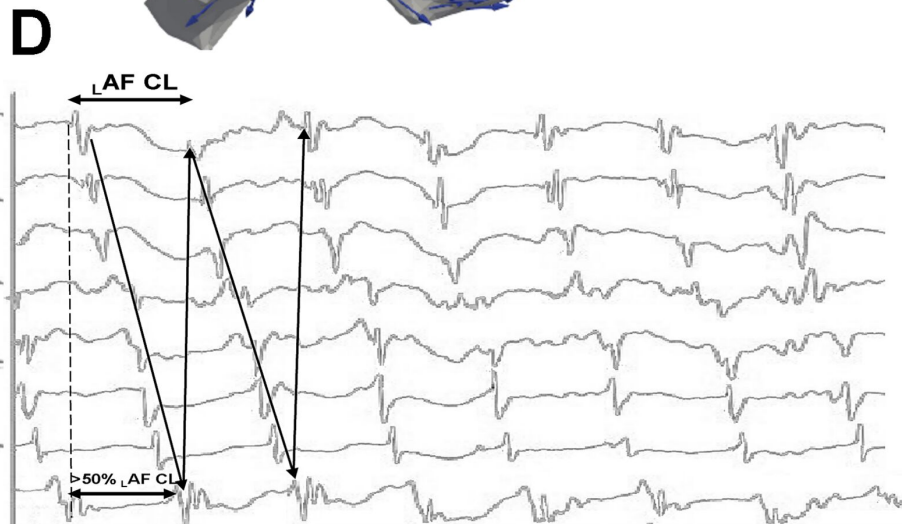

**A**

- Rotational LVZ
- Rotational nLVZ

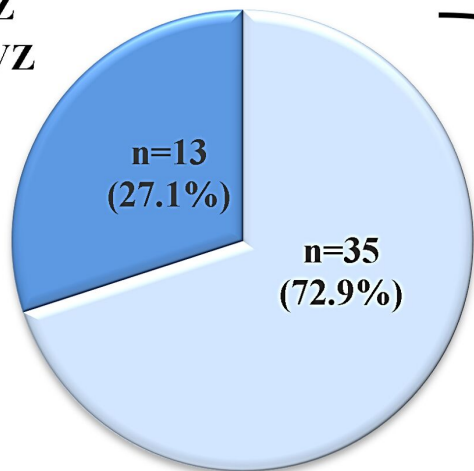

- Rotational + Focal
- Rotational

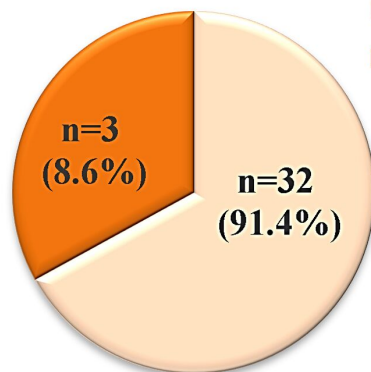**B**

- Focal LVZ
- Focal nLVZ

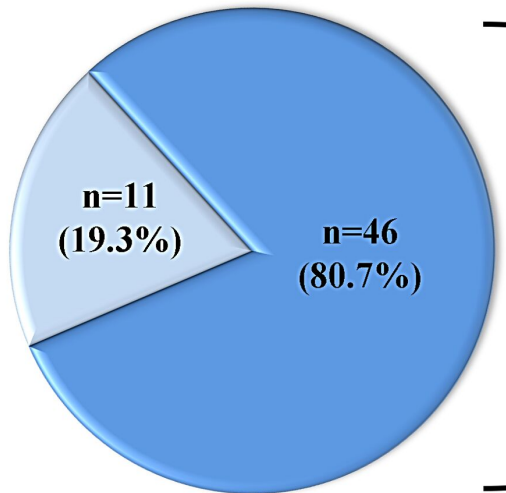

- Focal + Rotational
- Focal

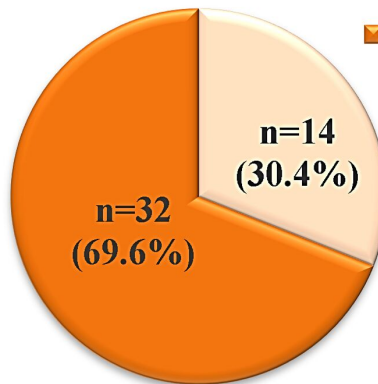

**A**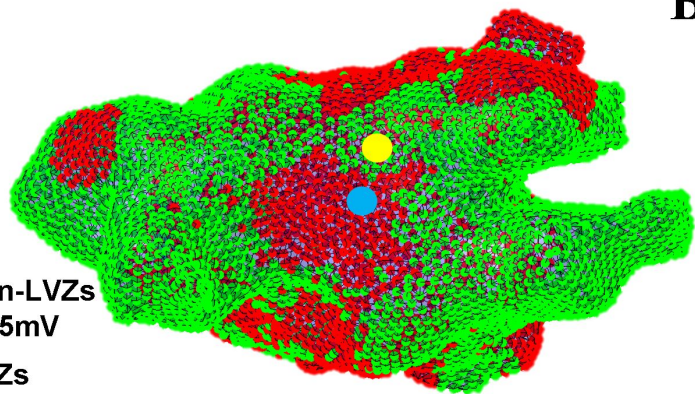

● Non-LVZs  
 $\geq 0.5\text{mV}$

● LVZs  
 $< 0.5\text{mV}$

**B**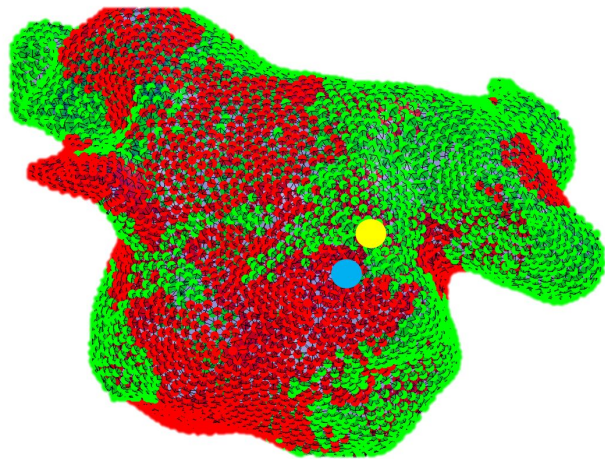**C**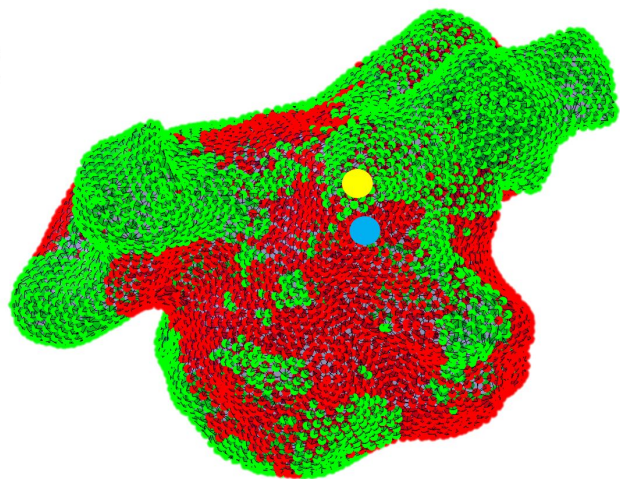**D**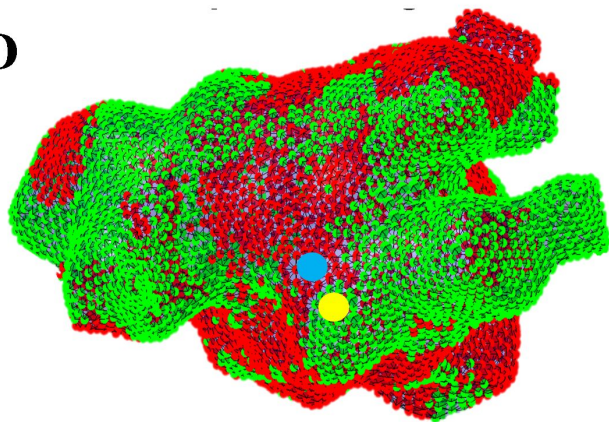

Source: https://medrxiv.org/content/10.1101/2023.09.01.23294966.full.pdf
